# Supplementary material for: Integration of shot-gun proteomics and bioinformatics analysis to explore plant hormone responses
Source: PubMed Central journal article supplement (PMC3439724; doi:10.1186/1471-2105-13-s15-s8), 2012-09-11

**A**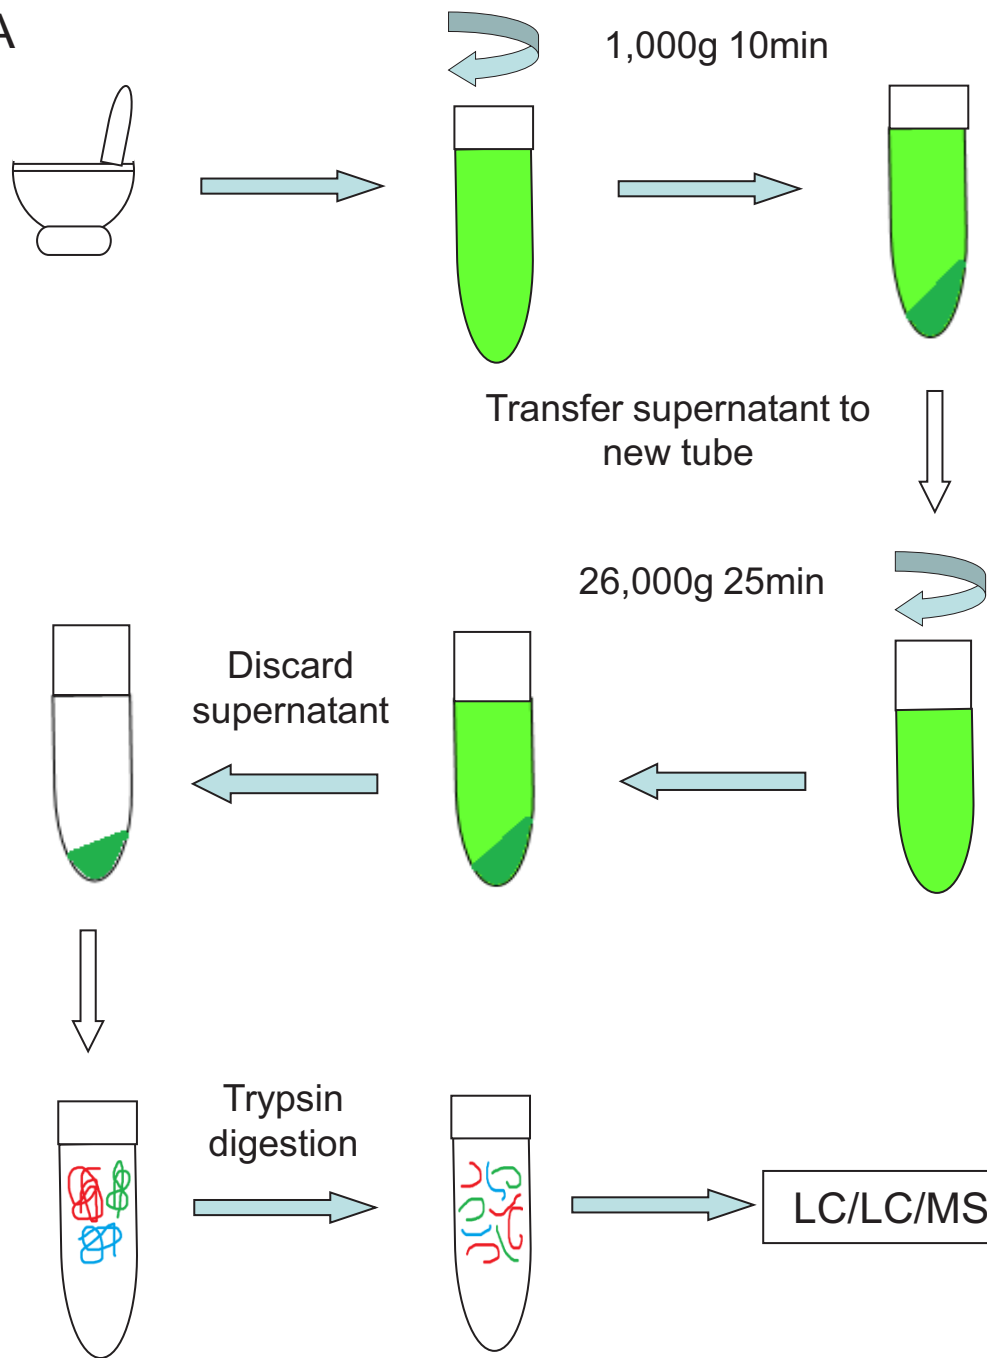**B**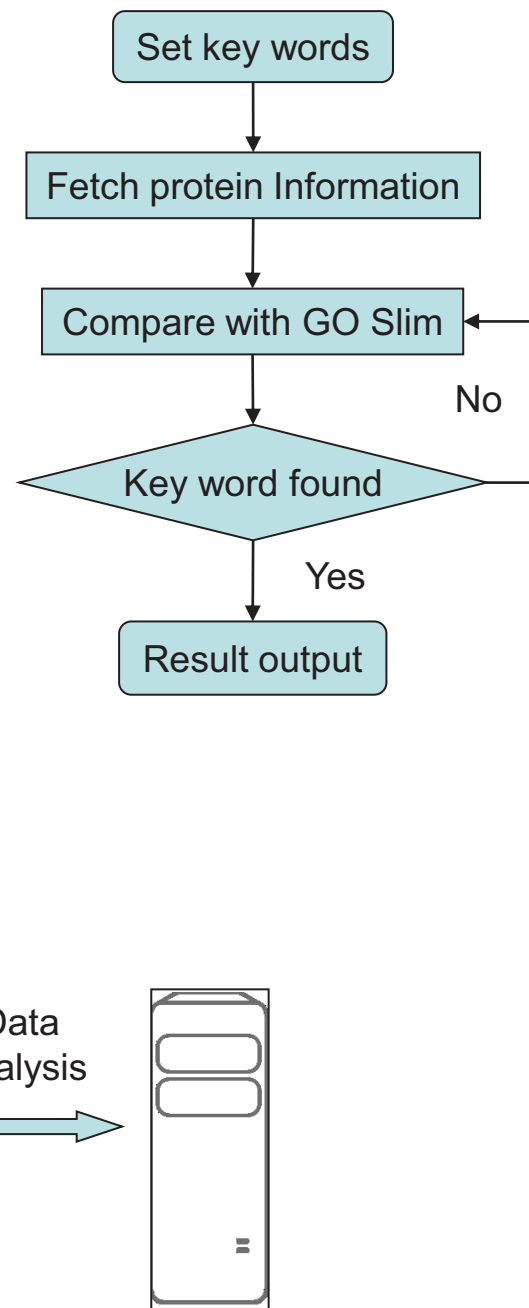

C

Grind tissues in  
liquid nitrogen

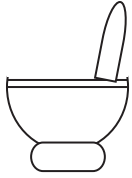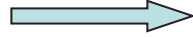

TCA/acetone  
cleanup

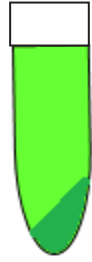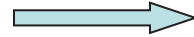

Acetone wash  
twice

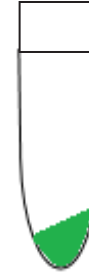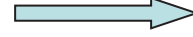

Protein  
solubilization

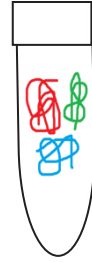

Supplement: 1471-2105-13-S15-S8-S1.pdf [file 1471-2105-13-S15-S8-S1.pdf]
